# Supplementary material
Source: PubMed Central journal article supplement (PMC5522010)

mRNA-seq  
reads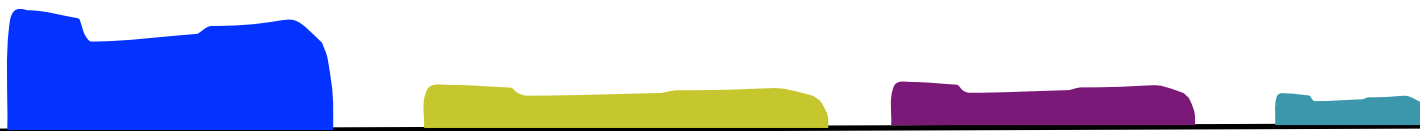Ribosome  
footprint  
reads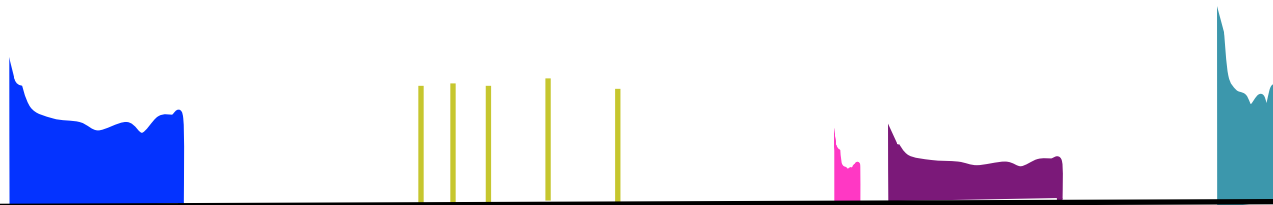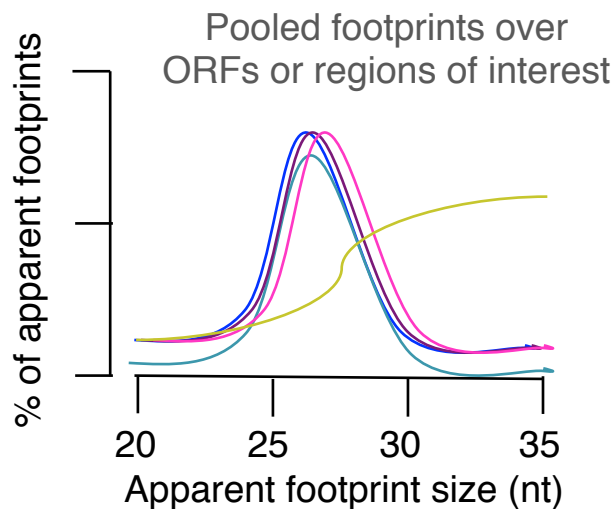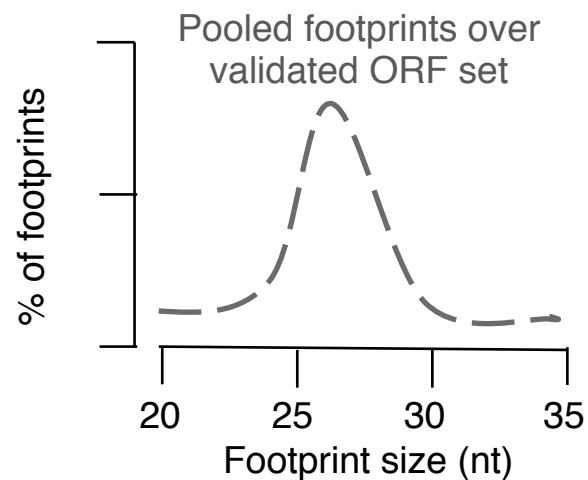

Quantify difference between each plot on the  
right and validated ORF footprint plot (left)

**Footprint Length Organization Similarity Score (FLOSS)**

Supplemental Figure b

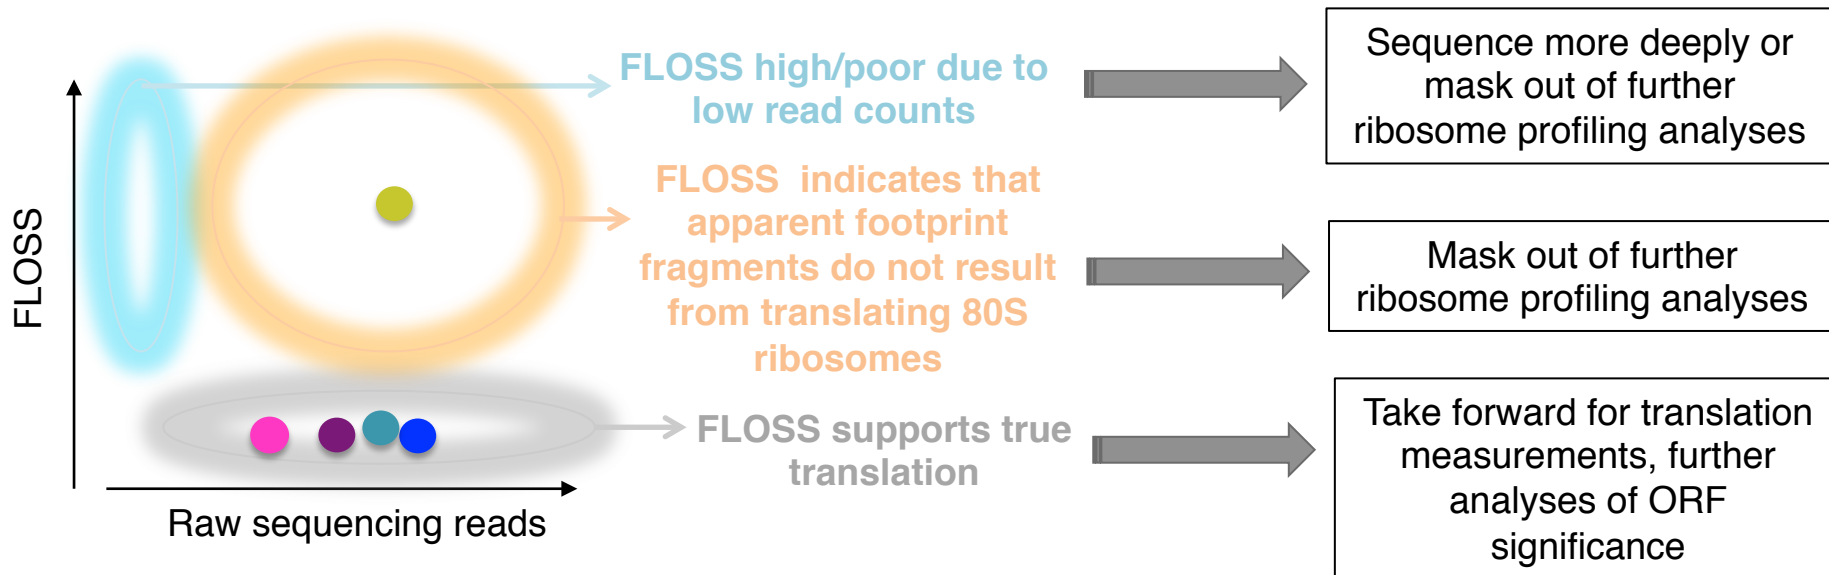

Supplemental Figure c

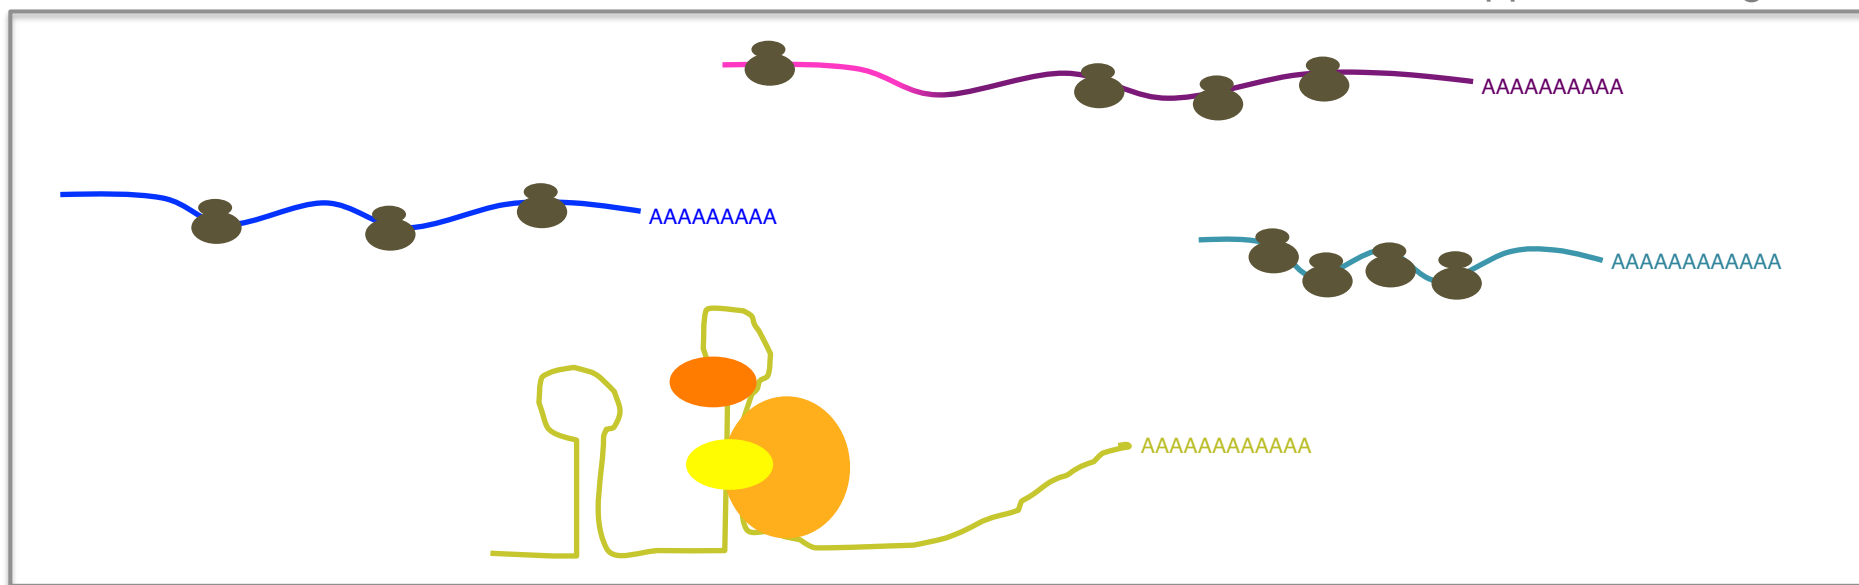

Supplement: NIHMS870137-supplement-supplemental__figure.pdf [file NIHMS870137-supplement-supplemental__figure.pdf]
